# Supplementary material
Source: Springer Nature journal article supplement (https://www.springermedizin.de/resource/supplementary/12885_2007_959_MOESM6_ESM.pdf/9471234)

*In vivo* Exposure

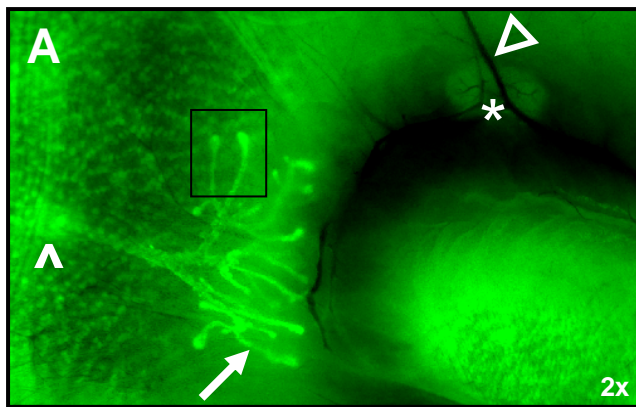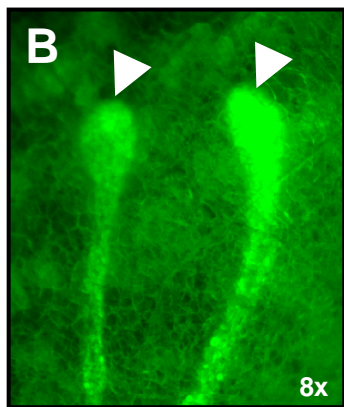

Post Exposure

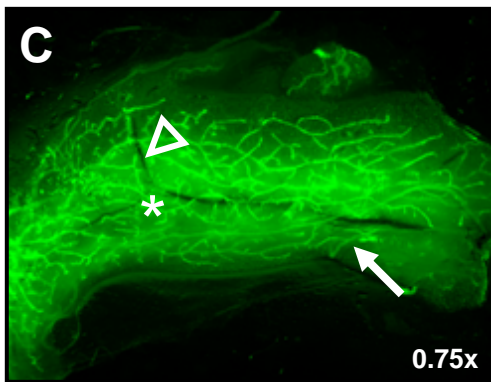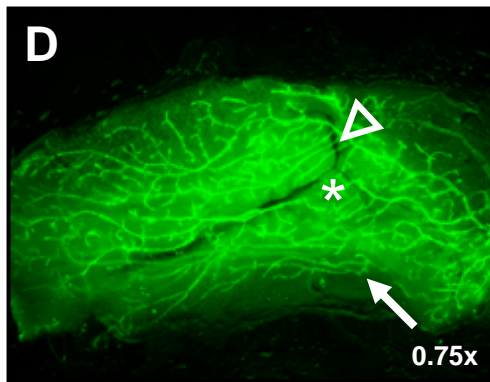

Supplement: MOESM6 [file 9471234]
